# Supplementary material
Source: PubMed Central journal article supplement (PMC5113848)
Supplement: ismej201658x3.pdf [file ismej201658x3.pdf]

Supplementary Table 3. RPKM values for genes associated with different cell-cell interactions in DHAB sediment samples.

|                                                                                                | Urania Control | Urania Middle Halocline | Discovery Upper Halocline | Discovery Lower Halocline | L'Atalante Lower Halocline |
|------------------------------------------------------------------------------------------------|----------------|-------------------------|---------------------------|---------------------------|----------------------------|
| <b>Pili</b>                                                                                    |                |                         |                           |                           |                            |
| Leader peptidase (Prepilin peptidase) (EC 3.4.23.43) / N-methyltransferase (EC 2.1.1.-)        | 0              | 346.2989                | 62.60717                  | 270.929772                | 0                          |
| MSHA pilin protein MshA                                                                        | 0              | 23.1311                 | 0                         | 0                         | 0                          |
| pilin like competence factor                                                                   | 0              | 0.124607                | 0                         | 38.9327                   | 0                          |
| Type IV pilin PilA                                                                             | 0              | 0.484357                | 7.56168                   | 464.249                   | 0                          |
| Pili assembly chaperone protein                                                                | 0              | 0                       | 0                         | 198.1228                  | 0                          |
| <b>Flagella</b>                                                                                |                |                         |                           |                           |                            |
| Flagellar basal-body rod proteins FigD, FigB, FigC, FigF, FigG                                 | 0              | 372.866615              | 0                         | 162.949021                | 0                          |
| Flagellar biosynthesis proteins FlhA, FlhB, FliL, FljP, FliR, FliS                             | 0              | 747.128131              | 3.64924                   | 2.1461                    | 0                          |
| Flagellar hook protein FlgE, FlgK, FlgL, FliD                                                  | 30.70813       | 1634.90163              | 0                         | 153.257231                | 0.685554                   |
| Flagellar hook-basal body complex protein FlIE                                                 | 0              | 72.3947                 | 0                         | 0                         | 0                          |
| Flagellar hook-length control protein FliK                                                     | 0              | 245.5744                | 0.731819                  | 0                         | 0                          |
| Flagellar M-ring protein FliF                                                                  | 0              | 119.3978                | 0                         | 0                         | 0                          |
| Flagellar motor rotation protein MotA, MotB                                                    | 0              | 453.693937              | 0                         | 220.4746                  | 0                          |
| Flagellar motor switch protein FliG, FliM                                                      | 0              | 185.437938              | 0                         | 94.7317                   | 0                          |
| Flagellar P-ring protein FljI                                                                  | 0              | 90.7147                 | 0                         | 6.34485                   | 0                          |
| Flagellar protein FljJ (EC 3.2.1.-)                                                            | 0              | 19.7872                 | 0                         | 0                         | 0                          |
| Flagellar regulatory protein FleQ                                                              | 5.77379        | 155.23                  | 0                         | 54.92005                  | 0                          |
| Flagellar synthesis regulator FleN                                                             | 0              | 0.158436                | 0                         | 92.9667                   | 0                          |
| Flagellin protein FlaA                                                                         | 0              | 64.4951025              | 0                         | 98.6241                   | 0                          |
| Flagellin protein FlaG                                                                         | 0              | 0.154249                | 0                         | 0                         | 0                          |
| Flagellum-specific ATP synthase FliI                                                           | 0              | 151.007                 | 0                         | 0                         | 0                          |
| RNA polymerase sigma factor for flagellar operon                                               | 0              | 24.1972                 | 20.8008                   | 0.140335                  | 0                          |
| Sodium-type flagellar protein motY precursor                                                   | 0              | 197.2229                | 0.346819                  | 0                         | 0                          |
| Chemotaxis regulator - transmits chemoreceptor signals to flagellar motor component            | 0              | 160.19657               | 0.381666                  | 0.421004                  | 0                          |
| <b>Adhesins</b>                                                                                |                |                         |                           |                           |                            |
| Incl1 plasmid conjugative transfer pilus-tip adhesin protein PilV                              | 0              | 0                       | 0                         | 8.99268                   | 0                          |
| Large exoproteins involved in heme utilization or adhesion                                     | 0              | 144.552038              | 0                         | 146.9789                  | 0.86135                    |
| Adhesin                                                                                        | 0              | 0.115179                | 0.763333                  | 0                         | 0                          |
| Autotransporter adhesin                                                                        | 6.43778        | 2.761564                | 5.24192                   | 702.913                   | 0                          |
| Fimbrial adhesin                                                                               | 0              | 0.150924                | 0                         | 224.5162                  | 4.96166                    |
| <b>Secretion</b>                                                                               |                |                         |                           |                           |                            |
| Predicted secretion system X protein GspE-like                                                 | 25.788         | 47.3371                 | 26.7035                   | 4.09109                   | 0.628453                   |
| Preprotein translocase subunits                                                                | 14.93073       | 613.509759              | 1030.578298               | 821.299721                | 0                          |
| Protein export cytoplasm chaperone proteins                                                    | 0              | 367.586741              | 1.870561                  | 786.7578                  | 53.4891                    |
| Protein export membrane proteins                                                               | 57.05482       | 415.248084              | 2.683062                  | 615.2749                  | 0                          |
| putative general secretion pathway protein                                                     | 11.6521        | 6.38676                 | 0                         | 647.5239                  | 0                          |
| Putative HlyD family secretion protein                                                         | 0              | 0                       | 0                         | 290.757                   | 0                          |
| putative IcmG-like type IV secretion system protein                                            | 0              | 0.148366                | 0                         | 82.5837                   | 0                          |
| SEC2 encodes a guanyl-nucleotide exchange factor for Sec4p and is essential for vesicle transp | 0              | 0                       | 2.45441                   | 0                         | 0                          |
| SECRETION ACTIVATOR PROTEIN                                                                    | 0              | 0                       | 0                         | 78.8007                   | 0                          |
| Secretion protein HlyD precursor                                                               | 0              | 0                       | 0                         | 16.2838                   | 0                          |
| similar to Type IV secretory pathway VirB4 components                                          | 0              | 0.673355                | 0                         | 0                         | 0                          |
| T1SS secreted agglutinin RTX                                                                   | 0              | 325.2605                | 0                         | 0                         | 0                          |
| Toxin secretion ABC transporter ATP-binding protein                                            | 0              | 168.1056                | 0                         | 0                         | 0                          |
| Type I secretion outer membrane protein, TolC precursor                                        | 3.73205        | 336.3785812             | 0                         | 180.5145                  | 2.12559                    |
| Type I secretion system, outer membrane component LapE # AggA                                  | 39.4006        | 1.796962                | 0.653838                  | 150.086                   | 0                          |
| Type II and III secretion system family protein                                                | 0              | 108.143                 | 0                         | 0                         | 0                          |
| type II secretion system protein E                                                             | 0              | 0                       | 28.1326                   | 25.9404                   | 0                          |
| Type II secretory pathway component PulF-like protein                                          | 0              | 0                       | 0                         | 68.9014                   | 0                          |
| Type II secretory pathway, ATPase Pule/Tfp pilus assembly pathway, ATPase PilB                 | 5.06912        | 167.3721                | 0.190833                  | 166.64314                 | 0                          |
| Type II/IV secretion system ATP hydrolase TadA/VirB11/CpaF, TadA subfamily                     | 0              | 153.4624                | 0                         | 0                         | 0                          |
| Type II/IV secretion system ATPase TadZ/CpaE, associated with Flp pilus assembly               | 0              | 0.0902434               | 0                         | 0.453556                  | 0                          |
| Type II/IV secretion system protein TadC, associated with Flp pilus assembly                   | 0              | 61.4897                 | 0                         | 0                         | 0                          |
| Type II/IV secretion system secretin RcpA/CpaC, associated with Flp pilus assembly             | 0              | 0                       | 0                         | 32.5083                   | 0                          |
| Type IV secretion system protein VirD4                                                         | 0              | 305.6175                | 0                         | 0.635098                  | 0                          |
| type IV secretory pathway VirB4 components-like protein                                        | 0              | 87.5727                 | 0                         | 0                         | 0                          |
| Type IV secretory pathway, VirB4 components                                                    | 0              | 123.8275                | 0                         | 0                         | 0                          |
| Type IV secretory pathway, VirD2 components (relaxase)                                         | 0              | 37.4573                 | 0                         | 0                         | 0                          |
| Type IV secretory pathway, VirD4 components                                                    | 0              | 114.92775               | 185.49                    | 0.317081                  | 0.457592                   |
| Type VI secretion lipoprotein/VasD                                                             | 0              | 0.247744                | 0                         | 0                         | 0                          |
| Vesicle coat complex COPII, subunit SEC24/subunit SFB2                                         | 0              | 107.975                 | 0                         | 0                         | 0                          |

|                                                                                               |            |             |             |             |             |
|-----------------------------------------------------------------------------------------------|------------|-------------|-------------|-------------|-------------|
| ATPase provides energy for both assembly of type IV secretion complex and secretion of T-DNA/ | 0          | 90.5083     | 0           | 0           | 0           |
| cell processes; transport of large molecules; protein, peptide secretion                      | 0          | 0.0803084   | 0           | 92.7661     | 0           |
| cyclolysin secretion ATP-binding protein                                                      | 0          | 0           | 0           | 91.2895     | 0           |
| Exocyst protein Sec3                                                                          | 0          | 1.87334     | 0           | 0           | 0           |
| FtsK/SpoIIIE family protein, putative EssC component of Type VII secretion system             | 0          | 0           | 0           | 20.41       | 0           |
| General secretion pathway protein C, D, E, F, G, I, J, K, L, M, N                             | 2200.07329 | 2676.305271 | 609.7310755 | 2052.009195 | 1962.853539 |
| Hemolysin activation/secretion protein                                                        | 0          | 46.5011     | 0           | 0           | 0           |
| HlyD family secretion protein                                                                 | 3.99242    | 61.121      | 4.87272     | 172.3203    | 0           |
| Inner membrane protein forms channel for type IV secretion of T-DNA complex, VirB3            | 0          | 36.0607     | 0           | 0           | 0           |
| Integral membrane protein EccD2, component of Type VII secretion system ESX-2                 | 0          | 0           | 0           | 16.7914     | 0           |
| Membrane protein EccE3, component of Type VII secretion system ESX-3                          | 0          | 0           | 0           | 7.15509     | 0           |
| Phosphatidylinositol transfer protein SEC14 and related proteins                              | 0          | 3.5097      | 0           | 0           | 0           |
| <b>Glycoproteins</b>                                                                          |            |             |             |             |             |
| Mycobacteriophage Barnyard protein gp56                                                       | 0          | 247.325121  | 7.506226    | 1090.96809  | 796.47      |
| Head-tail preconnector protein GP5                                                            | 0          | 0           | 0           | 5.98295     | 0           |
| Phage FluMu protein gp47                                                                      | 0          | 0           | 0           | 144.1023    | 0           |
| phage Gp37Gp68                                                                                | 0          | 0           | 0           | 0           | 727.897     |
| phage P2 small terminase subunit gpM-like protein                                             | 0          | 183.682     | 0.351402    | 0.387621    | 0           |
| Bacteriophage protein GP46                                                                    | 0          | 0           | 0           | 74.6632     | 0           |
| Glycoprotein gp2                                                                              | 0          | 0           | 0           | 28.7659     | 0           |
| Gp5 baseplate hub subunit and tail lysozyme                                                   | 0          | 0           | 48.0604     | 0           | 0           |
| <b>Polyketide synthesis</b>                                                                   |            |             |             |             |             |
| O-Methyltransferase involved in polyketide biosynthesis                                       | 9.11322    | 89.716771   | 0.573873    | 106.889     | 0           |
| Phenolphthiocerol synthesis type-I polyketide synthase PpsB (EC 2.3.1.41)                     | 0          | 4.77171     | 0           | 0           | 0           |
| Protein involved in biosynthesis of mitomycin antibiotics/polyketide fumonisin                | 0          | 49.6768     | 0           | 0           | 0           |
| putative polyketide synthase                                                                  | 0          | 326.2748    | 0           | 0.223042    | 0           |
| <b>Toxins</b>                                                                                 |            |             |             |             |             |
| Antitoxin 1                                                                                   | 0          | 0.177738    | 0           | 2.82878     | 0           |
| Death on curing protein, Doc toxin                                                            | 0          | 2.40231     | 8.39666     | 340.942     | 0           |
| HigA protein (antitoxin to HigB)                                                              | 0          | 92.5956     | 0           | 0           | 0           |
| HigB toxin protein                                                                            | 0          | 76.4618     | 0           | 0           | 0           |
| Putative insecticidal toxin complex                                                           | 0          | 31.3203     | 0           | 0           | 0           |
| RelE-like Cytotoxic translational repressor of toxin-antitoxin stability system               | 0          | 5.25759     | 8.27318     | 2685.28     | 0           |
| RTX toxin, putative                                                                           | 4.29185    | 1218.90867  | 2.709216    | 110.965945  | 0           |
| RTX toxins and related Ca <sup>2+</sup> -binding proteins                                     | 0          | 0           | 0           | 147.64566   | 0           |
| Target Of K1 Killer Toxin                                                                     | 0          | 1.35978     | 0           | 0           | 0           |
| Toxin secretion ABC transporter ATP-binding protein                                           | 0          | 168.1056    | 0           | 0           | 0           |
| YefM protein (antitoxin to YoeB)                                                              | 0          | 0           | 0           | 208.243     | 0           |
| YoeB toxin protein                                                                            | 0          | 0           | 0           | 154.345     | 0.150958    |
| Zeta toxin family protein                                                                     | 0          | 189.6226    | 0           | 0           | 0           |
| Zona occludens toxin                                                                          | 0          | 45.0617     | 0           | 23.283      | 0           |
| <b>Antibiotics</b>                                                                            |            |             |             |             |             |
| bleomycin resistance protein                                                                  | 0          | 34.6794     | 0           | 0           | 0           |
| fosmidomycin resistance protein                                                               | 7.98484    | 266.997     | 1.1288      | 0           | 0           |
| Fosmidomycin resistance protein                                                               | 0          | 0.62825     | 1.39131     | 301.96895   | 0.340534    |
| Fusaric Resistance Protein FusB / FusC /FusE                                                  | 0          | 168.908394  | 16.0359     | 339.719     | 0           |
| Methylenomycin A resistance protein                                                           | 0          | 0           | 0           | 0.14665     | 0           |
| Polymyxin resistance protein ArnA_FT, UDP-4-amino-4-deoxy-L-arabinose formylase (EC 2.1.2.-)  | 0          | 0           | 0           | 62.5226     | 0           |
| Polymyxin resistance protein ArnC, glycosyl transferase (EC 2.4.-.-)                          | 0          | 85.331137   | 0           | 355.5835    | 0           |
| Polymyxin resistance protein ArnT, undecaprenyl phosphate-alpha-L-Ara4N transferase; Melitt   | 0          | 1.166424    | 0.867047    | 419.7183    | 0           |
| Tetracycline efflux protein TetA                                                              | 0          | 60.362784   | 0           | 177.0605    | 0.130741    |
| Tetracycline-efflux transporter                                                               | 0          | 0           | 0           | 149.252     | 0           |
| <b>Other natural substances</b>                                                               |            |             |             |             |             |
| bacteriocin resistance protein, putative                                                      | 0          | 0.334267    | 0           | 313.605     | 0           |
| Acriflavin resistance plasma membrane protein                                                 | 2.02446    | 736.823579  | 3.71801     | 394.12842   | 0           |
| Acriflavin resistance protein                                                                 | 0          | 114.279     | 0.251635    | 276.755235  | 106.918     |
| acriflavine resistance protein A precursor                                                    | 0          | 0.293183    | 0           | 259.97      | 0           |
| Ethidium bromide-methyl viologen resistance protein EmrE                                      | 5.67205    | 1.2748      | 0.794505    | 448.015     | 0           |
| Methyl viologen resistance protein smvA                                                       | 0          | 0.689754    | 0           | 539.139     | 0           |
| Organic hydroperoxide resistance protein                                                      | 0          | 53.114      | 0           | 245.195     | 0           |
| Organic hydroperoxide resistance transcriptional regulator                                    | 0          | 147.941     | 19.4909     | 162.116     | 0           |
| <b>Putative mechanisms to avoid natural substances including antibiotics</b>                  |            |             |             |             |             |
| drug resistance transporter, Bcr/CflA family protein                                          | 3.68399    | 26.9848     | 0           | 246.879     | 0           |
| drug resistance transporter, EmrB/QacA family                                                 | 0          | 0           | 0           | 19.7906     | 0           |
| Inner membrane component of tripartite multidrug resistance system                            | 0          | 1685.68757  | 0.438287    | 920.939748  | 0.29092     |

|                                                                                          |          |            |            |            |           |
|------------------------------------------------------------------------------------------|----------|------------|------------|------------|-----------|
| Membrane fusion component of tripartite multidrug resistance system                      | 6.25027  | 109.390164 | 1.04614    | 1570.83972 | 7.15413   |
| Multidrug resistance ABC transporter ATP-binding and permease protein                    | 0        | 24.2579    | 0          | 0          | 0         |
| Multidrug resistance efflux pump                                                         | 0        | 0          | 0.731819   | 0          | 0         |
| Multidrug resistance protein A and B                                                     | 0        | 150.303171 | 0          | 52.7939    | 0         |
| Multidrug resistance transporter, Bcr/CflA family                                        | 0        | 0.616681   | 0          | 417.3887   | 0.354265  |
| Multidrug resistance-associated protein/mitoxantrone resistance protein, ABC superfamily | 0        | 136.8694   | 0          | 0          | 0         |
| MATE efflux family protein                                                               | 0        | 13.765     | 0          | 193.7911   | 0         |
| MFS family multidrug efflux protein in Burkholderiaceae, unknown substrate               | 0        | 20.5627    | 0          | 0          | 0         |
| MFS family multidrug efflux protein, similarity to bicyclomycin resistance protein Bcr   | 34.8265  | 5.878977   | 19.0388    | 361.4108   | 58.3551   |
| MFS multidrug efflux pump, B subunit                                                     | 0        | 0.266157   | 0          | 87.8593    | 0         |
| Multi antimicrobial extrusion protein (Na+)/drug antiporter, MATE family of MDR efflux   | 0        | 0.149379   | 0          | 296.64704  | 0         |
| Multidrug efflux membrane fusion protein MexE                                            | 0        | 98.5468    | 0          | 0          | 0         |
| multidrug efflux protein                                                                 | 0        | 8.96799    | 0          | 0          | 0         |
| Multidrug efflux RND transporter MexD                                                    | 0        | 180.8099   | 0          | 0          | 0         |
| Multidrug efflux transporter MexF                                                        | 0        | 195.9153   | 0          | 0          | 0         |
| Na+-driven multidrug efflux pump                                                         | 0        | 67.15029   | 0          | 0          | 0         |
| Probable aminoglycoside efflux pump                                                      | 0        | 63.8073    | 0          | 0.121198   | 0         |
| Probable RND efflux membrane fusion protein                                              | 50.2811  | 273.878262 | 0          | 73.8707    | 0         |
| Probable transcription regulator protein of MDR efflux pump cluster                      | 3.91354  | 0.557999   | 0.758666   | 131.5801   | 0.165146  |
| Putative DMT superfamily metabolite efflux protein precursor                             | 0        | 0.888362   | 0          | 492.3525   | 0         |
| putative RND type efflux pump                                                            | 17.86212 | 2.085028   | 1.971719   | 994.9414   | 38.037872 |
| RND efflux system, inner membrane transporter CmeB                                       | 82.15748 | 347.02369  | 29.883372  | 1904.72918 | 0.992629  |
| RND efflux system, membrane fusion protein CmeA                                          | 40.7266  | 366.45466  | 3.87225    | 355.73068  | 0         |
| RND efflux system, outer membrane lipoprotein CmeC                                       | 71.60321 | 182.625948 | 4.544351   | 1040.61576 | 0.725642  |
| RND efflux system, outer membrane lipoprotein, NodT family                               | 0        | 0.176484   | 0          | 102.669    | 0         |
| RND efflux transporter                                                                   | 0        | 487.182726 | 23.661666  | 966.768898 | 0.926882  |
| RND multidrug efflux transporter; Acriflavin resistance protein                          | 11.78286 | 243.862985 | 126.941005 | 1576.9421  | 0.529036  |
| RND type efflux pump involved in aminoglycoside resistance                               | 0        | 0          | 0          | 79.6457    | 0         |
