# Supplementary material
Source: PubMed Central journal article supplement (PMC5113848)

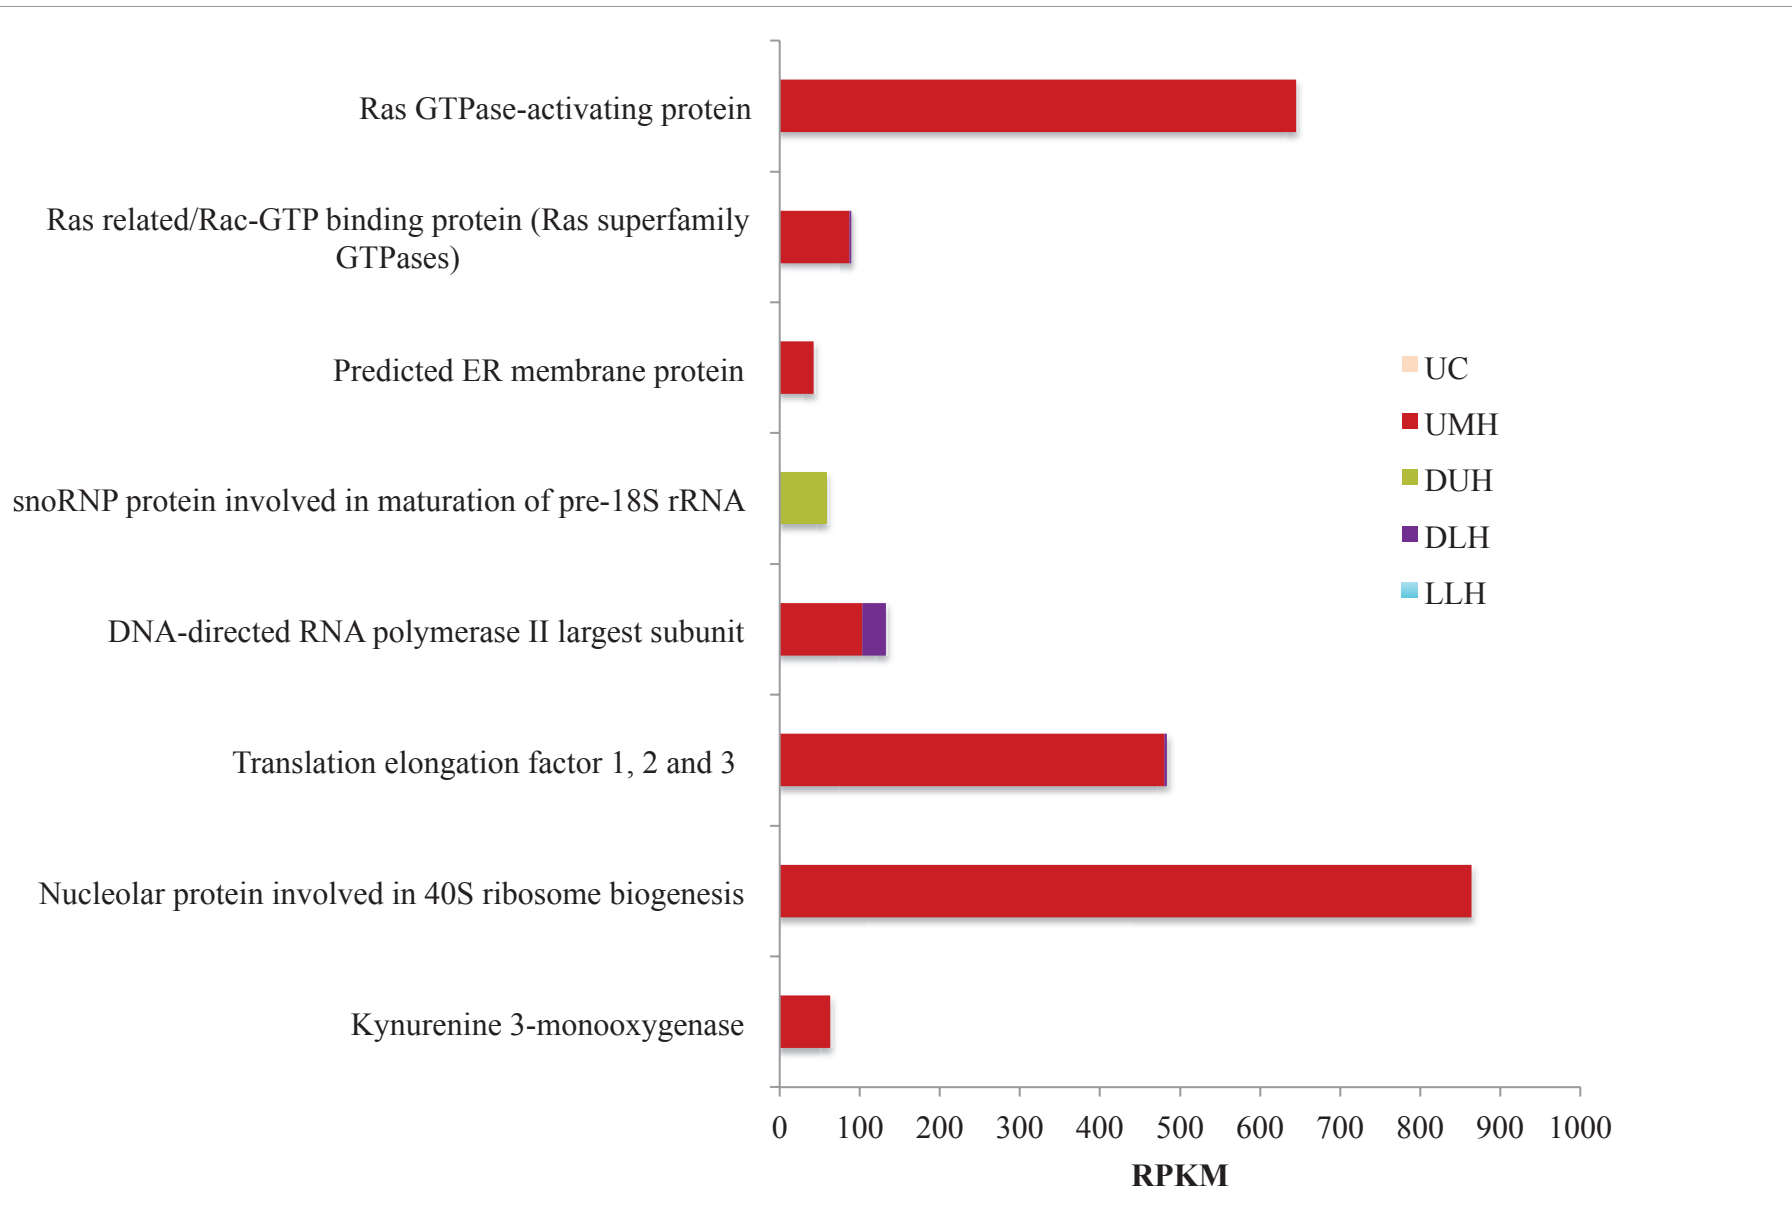

Supplement: ismej201658x10.pdf [file ismej201658x10.pdf]

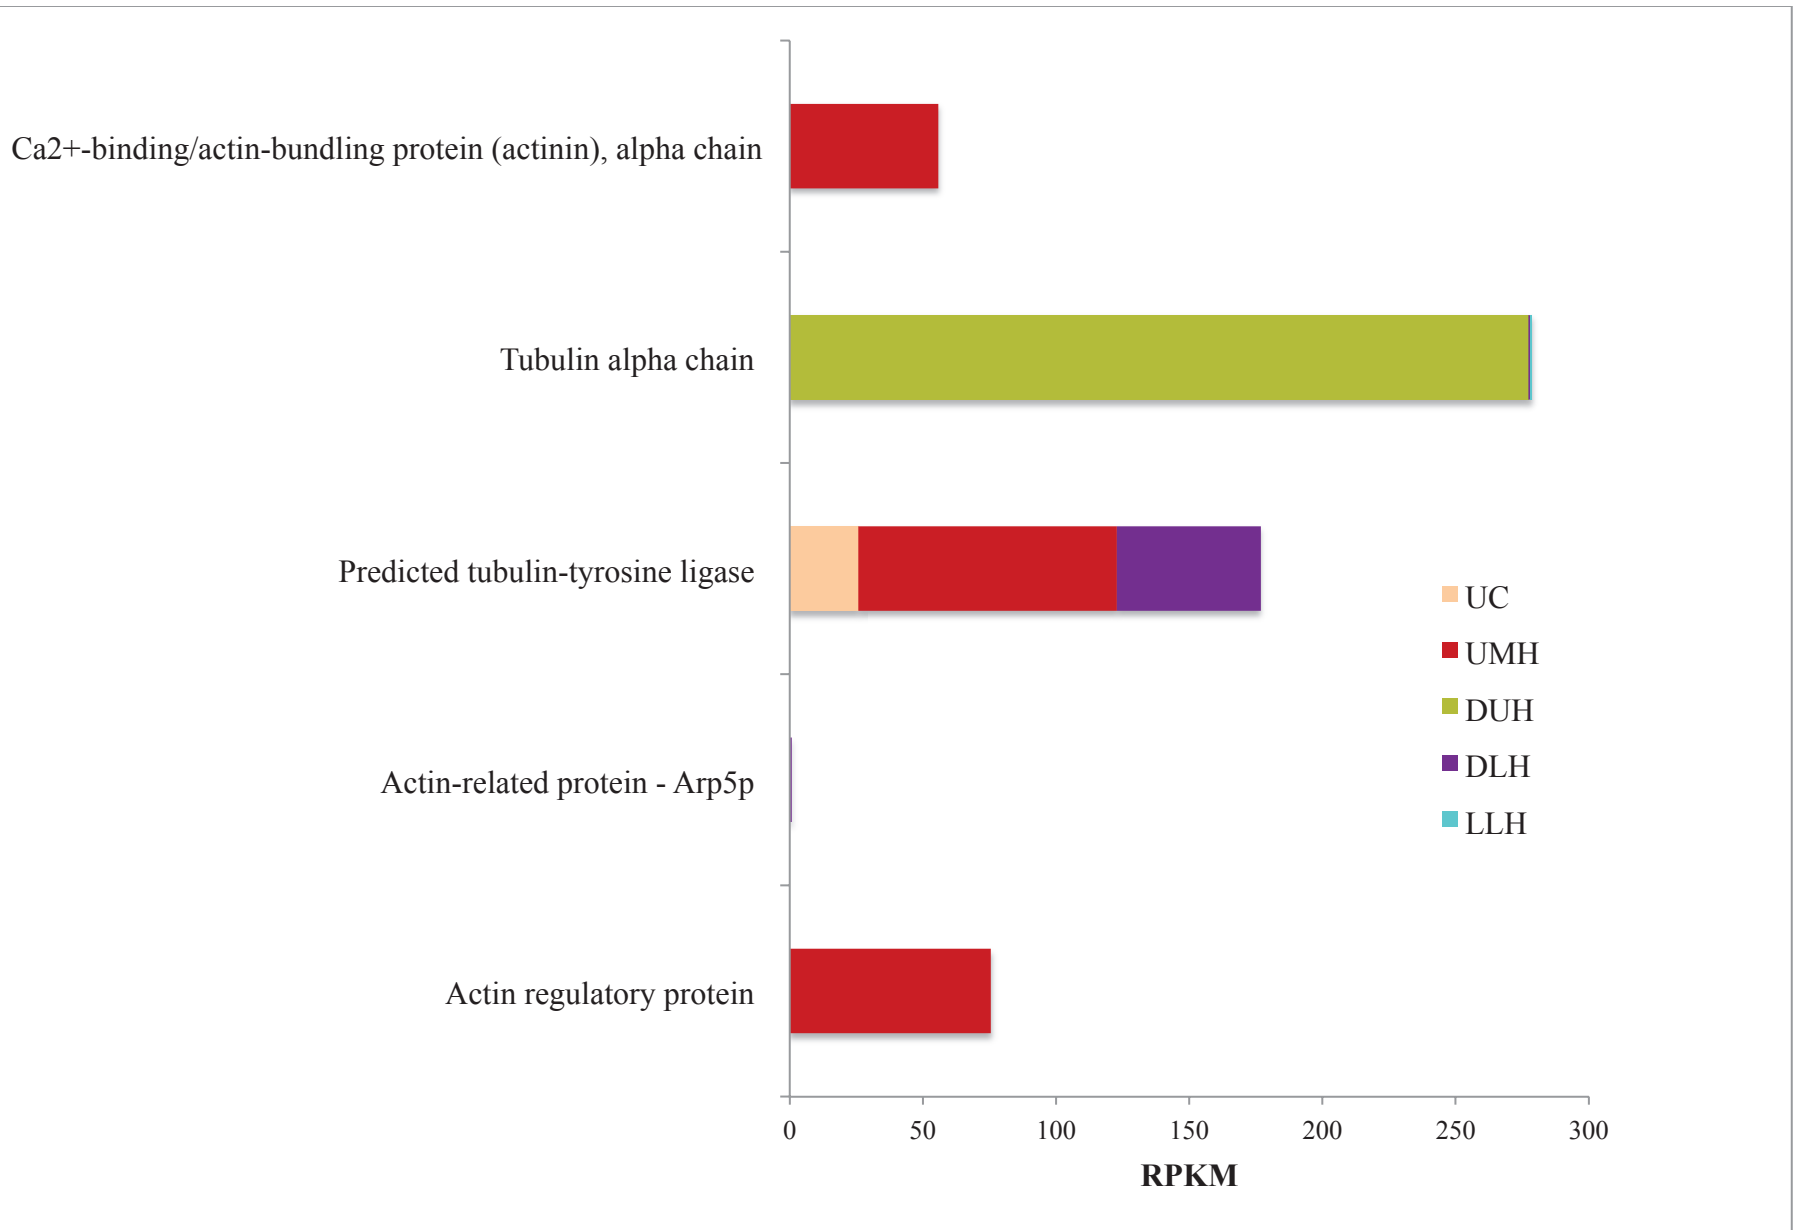

Supplement: ismej201658x11.pdf [file ismej201658x11.pdf]

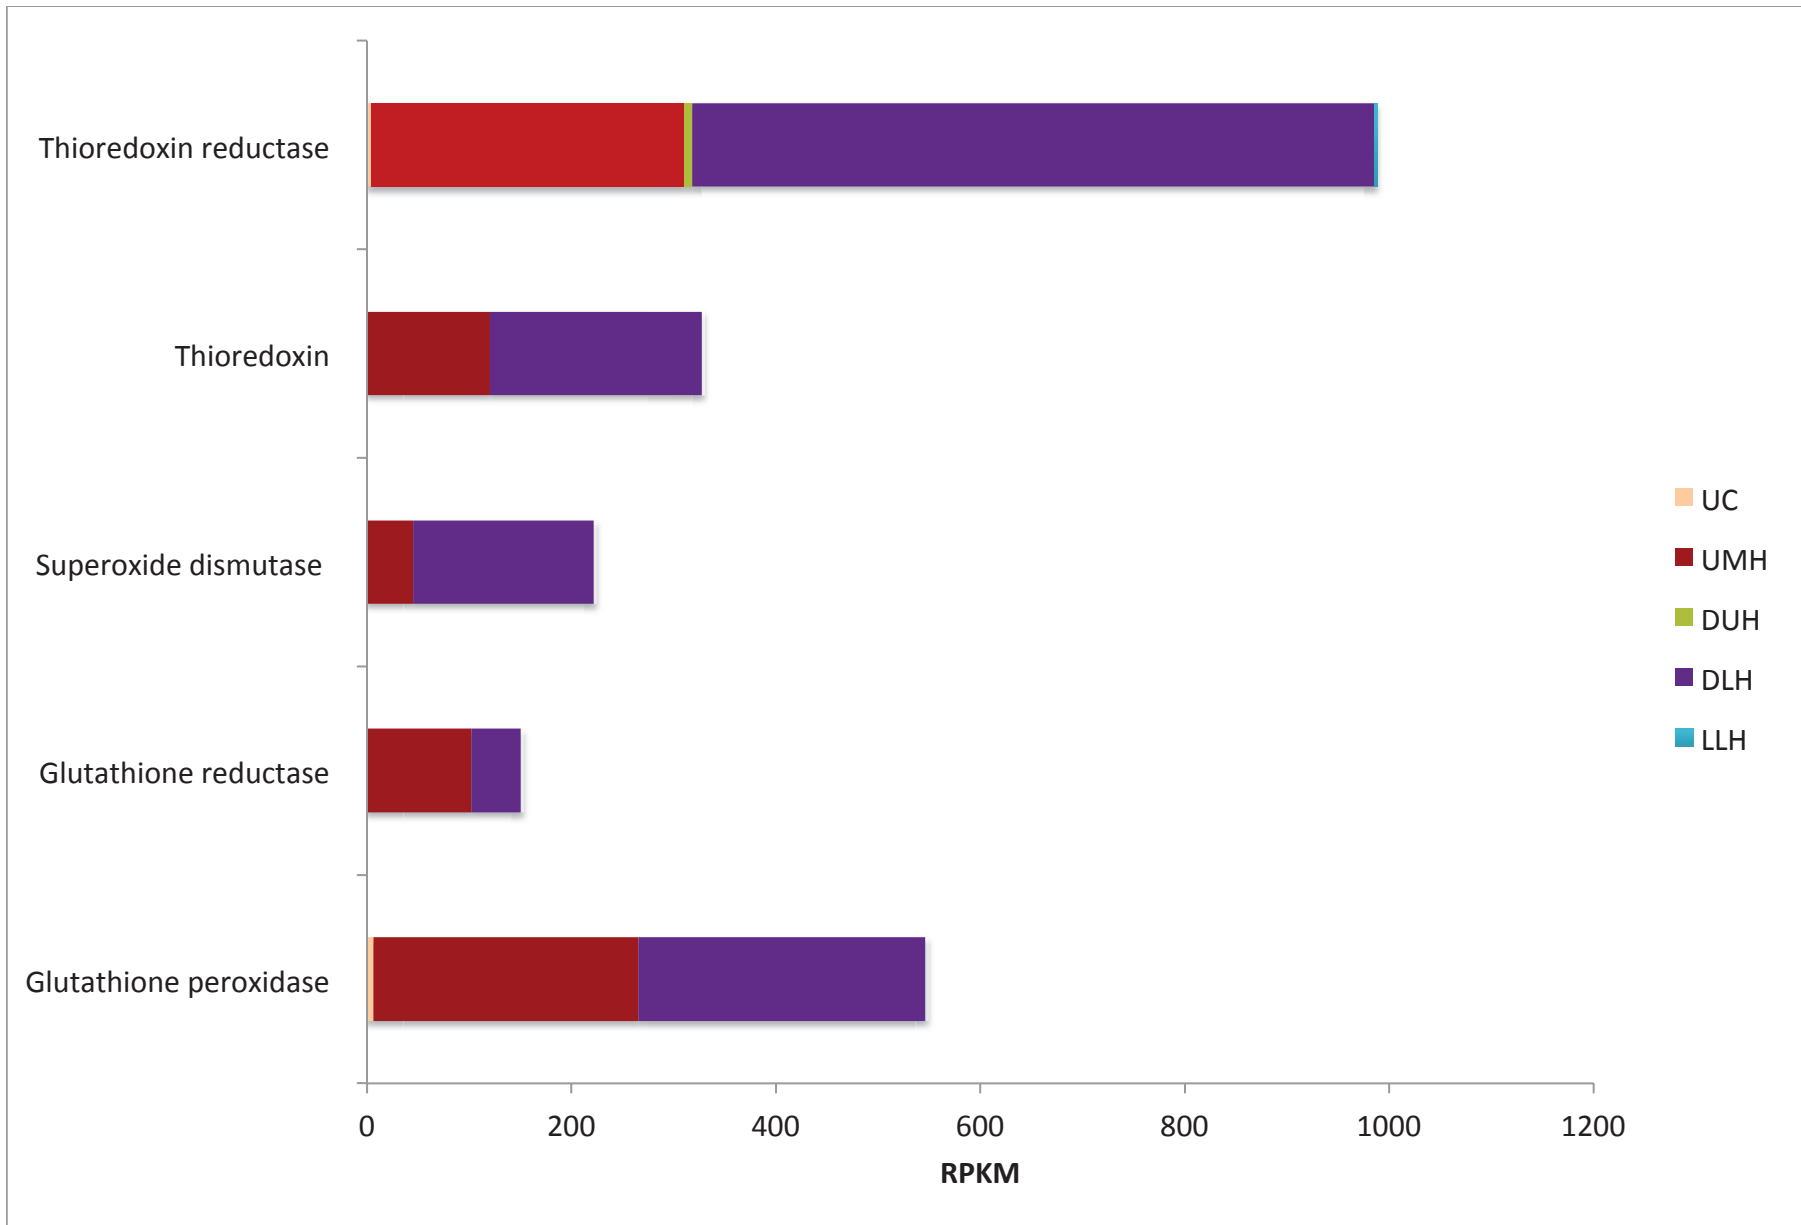

Supplement: ismej201658x8.pdf [file ismej201658x8.pdf]

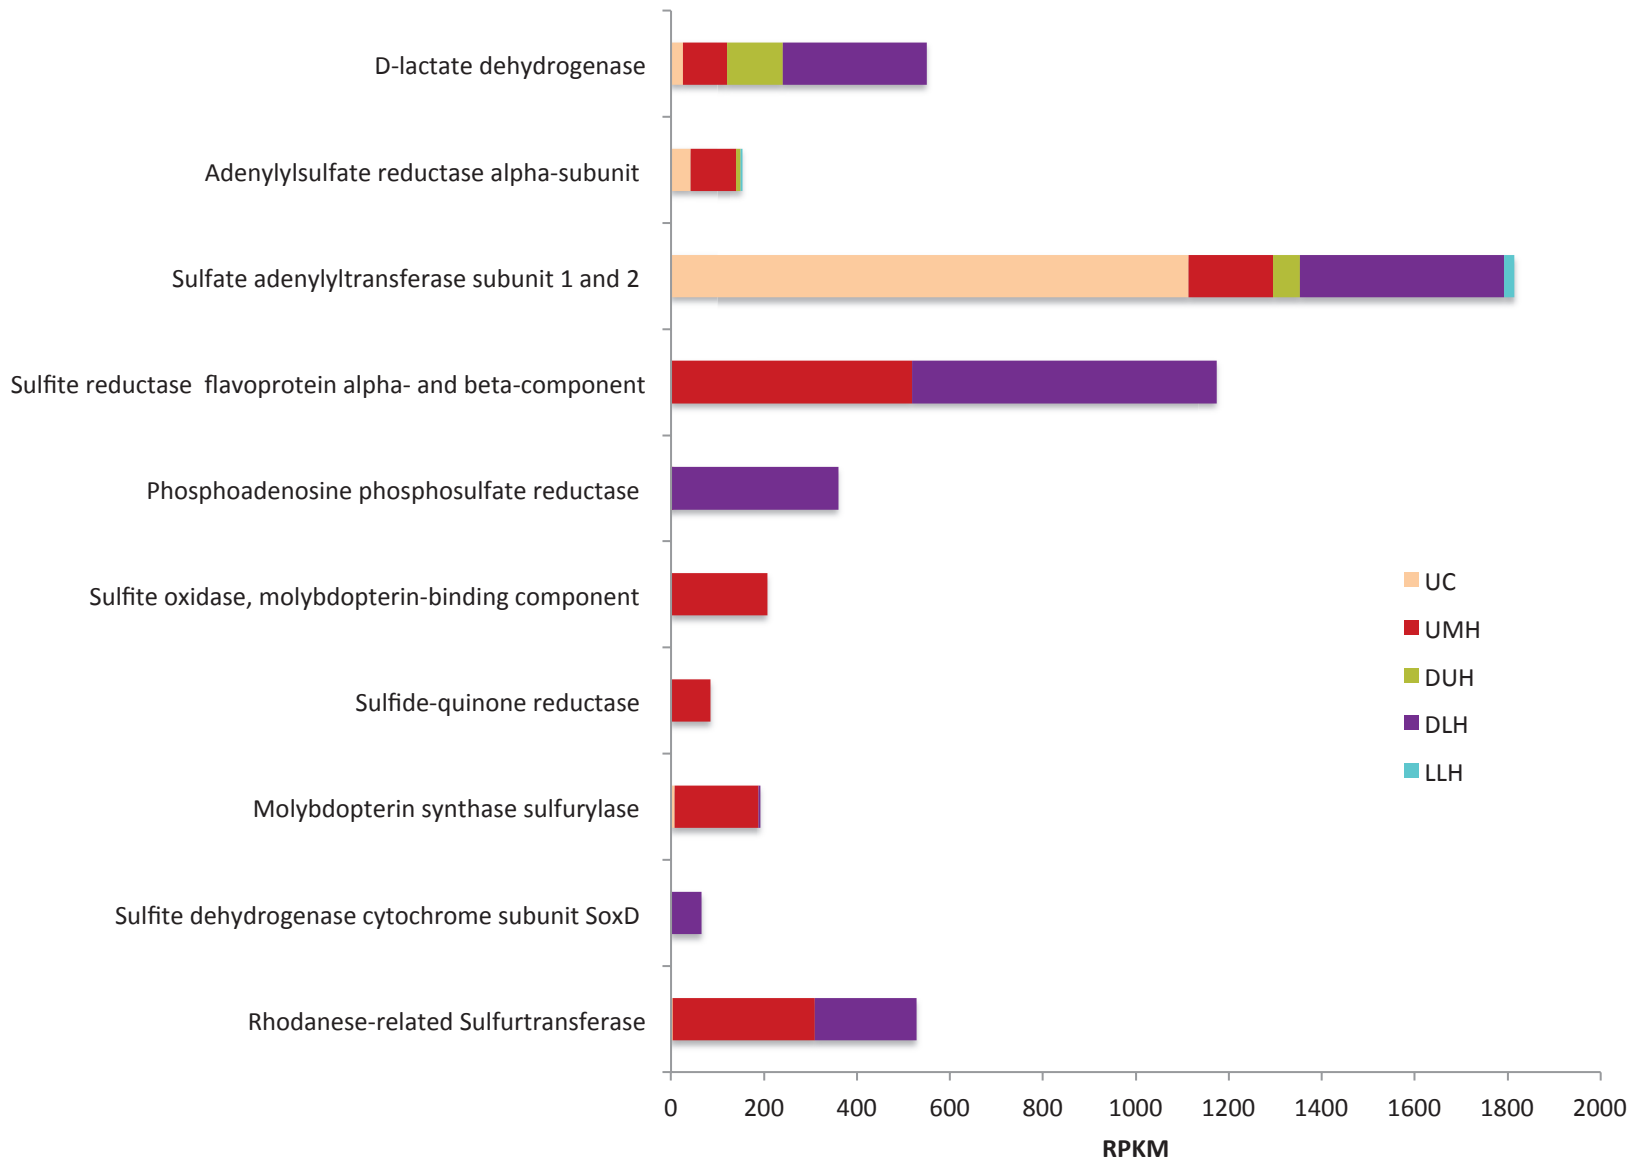

Supplement: ismej201658x9.pdf [file ismej201658x9.pdf]
